# Supplementary material for: Modic changes—Their associations with low back pain and activity limitation: A systematic literature review and meta-analysis
Source: PubMed Central journal article supplement (PMC6070210; doi:10.1371/journal.pone.0200677), 2018-08-01
Supplement: pone.0200677.s004.pdf [file pone.0200677.s004.pdf]

## PROSPERO International prospective register of systematic reviews

---

### **Modic changes: prevalence and association with low back pain - a systematic literature review and meta-analysis**

*Christofer Herlin, Tue Secher Jensen, Per Kjær, Ansgar Espeland, Jan Sture Skouen, Charlotte Leboeuf-Yde, Jaro Karppinen, Jaakko Niinimäki, Joan Solgaard Sørensen, Kjersti Storheim*

---

#### **Citation**

Christofer Herlin, Tue Secher Jensen, Per Kjær, Ansgar Espeland, Jan Sture Skouen, Charlotte Leboeuf-Yde, Jaro Karppinen, Jaakko Niinimäki, Joan Solgaard Sørensen, Kjersti Storheim. Modic changes: prevalence and association with low back pain - a systematic literature review and meta-analysis. PROSPERO 2015:CRD42015017350 Available from [http://www.crd.york.ac.uk/PROSPERO\\_REBRANDING/display\\_record.asp?ID=CRD42015017350](http://www.crd.york.ac.uk/PROSPERO_REBRANDING/display_record.asp?ID=CRD42015017350)

#### **Review question(s)**

What is the prevalence of modic changes in different age groups and in different study populations?

Is the presence and characteristics of modic changes associated with non-specific LBP and disability in the adolescent and adult populations?

Is any such association modified by other factors, e.g. age, sex, and other degenerative MRI findings?

#### **Searches**

MEDLINE, EMBASE and CINAHL electronic databases will be searched.

No restrictions will be applied.

#### **Types of study to be included**

Consecutive or random samples in population based or clinical studies, prospective, retrospective or cross-sectional. Excluding case reports, conference papers, letters to the editor, in-vitro studies, ex-vivo studies, animal studies.

#### **Condition or domain being studied**

Vertebral Endplate Signal (Modic) Changes, defined by MRI of the lumbar spine. Prevalence and association with LBP.

#### **Participants/ population**

All populations, both general population and clinical. All ages. Participants with specific LBP conditions are excluded: Spondylitis, discitis or spondylodiscitis, spondylarthropathy (e.g. ankylosing spondylitis), fracture (including isthmic spondylolisthesis), spinal cord infarction, malignancy, hematological conditions, juvenile/idiopathic scoliosis. Also, participants treated with radiotherapy, or who have had spine surgery are excluded. Pre-intervention data will be included if available.

#### **Intervention(s), exposure(s)**

Vertebral Endplate Signal (Modic) Changes

#### **Comparator(s)/ control**

Not applicable

#### **Outcome(s)**

##### **Primary outcomes**

LBP, self-reported or by experimental measure (algometry, discography)

---

### Secondary outcomes

LBP-related disability as measured by Oswestry Disability Index, Roland Morris Disability Questionnaire or similar.

### Data extraction, (selection and coding)

Two investigators will independently inspect all retrieved titles, and exclude those articles that clearly do not fulfill the inclusion criteria and/or meet the exclusion criteria.

In cases of disagreement between the two investigators participating in the selection process, a third investigator will be consulted and the disagreement will be solved by discussion and further insights.

Two groups of investigators will handle each their objective in terms of data extraction. One group will handle the association studies (a-group), while the other handles the prevalence studies (p-group). The following process will be the same for both groups unless otherwise stated.

Two investigators will extract relevant data from each article, independently, using a form developed for this purpose. Disagreements will be resolved by discussion with a third participant of the group. If more input and/or insight is needed, the whole group will be consulted.

Data to be extracted from included articles:

- \* Year
- \* Country of data collection
- \* Study population
- \* Race of study population
- \* Sampling method
- \* Number of individuals
- \* Age
- \* Source of funding
- \* VESC/Modic definitions
- \* LBP definitions
- \* Disability definitions
- \* LBP data
- \* Disability data

### Risk of bias (quality) assessment

Two independent investigators will assess the quality of the included articles, independently.

Quality/bias assessment for both prevalence and association studies will be based on the Quality Assessment of Diagnostic Accuracy Studies list (QUADAS 2) as recommended by the Cochrane Diagnostic Test Accuracy Working Group

Results from the quality assessment will be used for sensitivity analysis.

### Strategy for data synthesis

Included articles will be presented in a table along with study characteristics

while excluded articles are referenced in an Appendix.

The prevalence rates of Modic changes will be reported in relation to the number of individuals and/or in relation to the number of affected vertebral lumbar levels used as the denominator.

Modic changes in relation to LBP and disability where association estimates are reported (e.g. odds ratios) will be extracted from the articles.

Modic changes in relation to LBP and disability will be analyzed in two by two tables, where odds ratios will be calculated. Confidence intervals which do not include 1.0, will be considered statically significant.

In case of many included articles, the statistical analysis will be made as a meta-analysis

for studies that are homogeneous in relation to study population and clinical outcome, e.g. patients referred for lumbar surgery who had had provocative discography. Otherwise the different studies will be analyzed individually, and form the basis for a descriptive synthesis.

#### **Analysis of subgroups or subsets**

None planned

#### **Contact details for further information**

Dr Secher Jensen

Spine Center of Southern Denmark

Østre Hougvej 55

DK-5500 Middelfart

Denmark

Tue.Secher.Jensen@rsyd.dk

#### **Organisational affiliation of the review**

None

#### **Review team**

Mr Christofer Herlin,

Dr Tue Secher Jensen, 1) Clinical Associate Professor, Institute of Regional Health Research, University of Southern Denmark, Odense, Denmark 2) Senior Researcher, Nordic Institute of Chiropractic and Clinical Biomechanics, Odense, Denmark.

Dr Per Kjær, Department of Sports Science and Clinical Biomechanics, University of Southern Denmark, Odense, Denmark

Professor Ansgar Espeland, Department of Radiology, Haukeland University Hospital, Bergen and Department of Clinical Medicine, University of Bergen

Professor Jan Sture Skouen, Department of Global Public Health and Primary Care, University of Bergen, Norway. Department of Physical Medicine and Rehabilitation, Haukeland University Hospital, Bergen, Norway.

Professor Charlotte Leboeuf-Yde, The Spine Center of Southern Denmark, Hospital Lillebælt and Institute of Regional Health Research, University of Southern Denmark, Odense, Denmark

Professor Jaro Karppinen, 1) Center for Life Course Epidemiology and Systems Medicine, Faculty of Medicine, University of Oulu 2) Medical Research Center Oulu, Oulu University Hospital and University of Oulu, and 3) Finnish Institute of Occupational Health, Oulu, Finland  
Dr Jaakko Niinimäki, Department of Diagnostic Radiology, Oulu University Hospital, Oulu, Finland  
Dr Joan Solgaard Sørensen, External Lecturer, University of Southern Denmark, Odense, Denmark  
Dr Kjersti Storheim, Communication and Research Unit for Musculoskeletal Disorders (FORMI), Oslo University Hospital and University of Oslo

**Anticipated or actual start date**

01 March 2015

**Anticipated completion date**

15 December 2015

**Funding sources/sponsors**

Funded by a grant from the Et Liv i Bevegelse (ELIB) foundation.

**Conflicts of interest**

None known

**Language**

English

**Country**

Denmark, Finland, Norway

**Subject index terms status**

Subject indexing assigned by CRD

**Subject index terms**

Humans; Low Back Pain; Lumbar Vertebrae; Prevalence

**Stage of review**

Ongoing

**Date of registration in PROSPERO**

27 April 2015

**Date of publication of this revision**

27 April 2015

**DOI**

10.15124/CRD42015017350

**Stage of review at time of this submission**

|                                                                 | <b>Started</b> | <b>Completed</b> |
|-----------------------------------------------------------------|----------------|------------------|
| Preliminary searches                                            | No             | Yes              |
| Piloting of the study selection process                         | No             | Yes              |
| Formal screening of search results against eligibility criteria | Yes            | No               |
| Data extraction                                                 | No             | No               |
| Risk of bias (quality) assessment                               | No             | No               |
| Data analysis                                                   | No             | No               |

**International prospective register of systematic reviews**

The information in this record has been provided by the named contact for this review. CRD has accepted this information in good faith and registered the review in PROSPERO. CRD bears no responsibility or liability for the content of this registration record, any associated files or external websites.

---
